# Supplementary material for: Phytochemical composition, antioxidant, in vitro and in silico studies of active compounds of Curculigo latifolia extracts as promising elastase inhibitor
Source: PubMed Central journal article supplement — Saudi J Biol Sci. 2023 Jun 23;30(8):103716. doi: 10.1016/j.sjbs.2023.103716 (PMC10344807; doi:10.1016/j.sjbs.2023.103716), 2023-06-23
Supplement: mmc1.pdf [file mmc1.pdf]

# Supplementary Material

## Compound 1. Methyl-3-hydroxy-4-methoxybenzoate

Channel name: 1: +183.0649 (50.8 PPM) +184.0682 (50.8 PPM) +185.0695 (50.8 PPM) : TOF MS<sup>E</sup> (100-1200) 6eV ESI+ - Low CE :  
Integrated : Smoothed

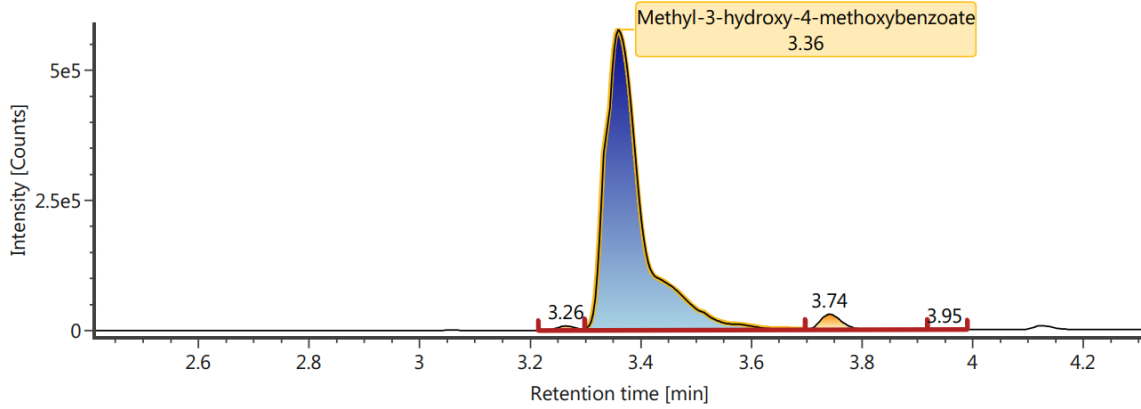

### Low Energy

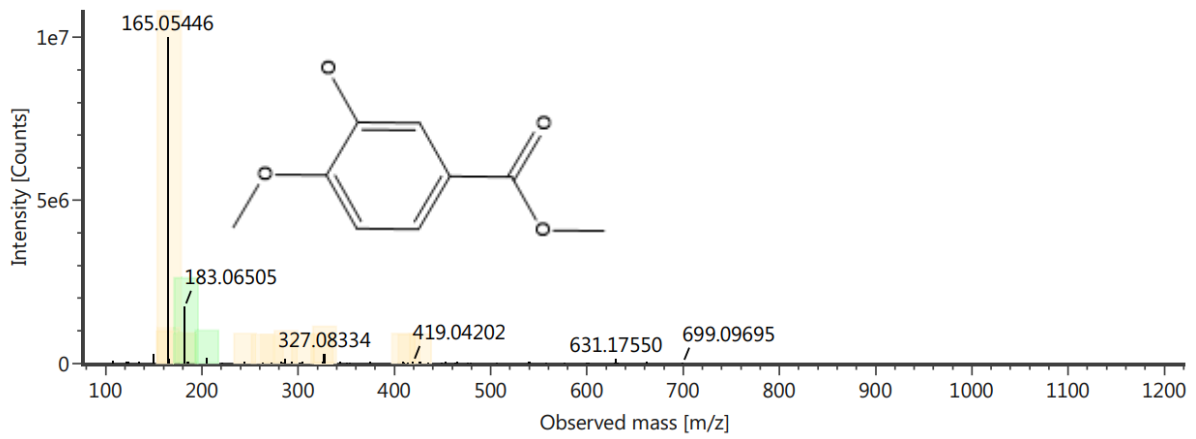

### High Energy

Item description:

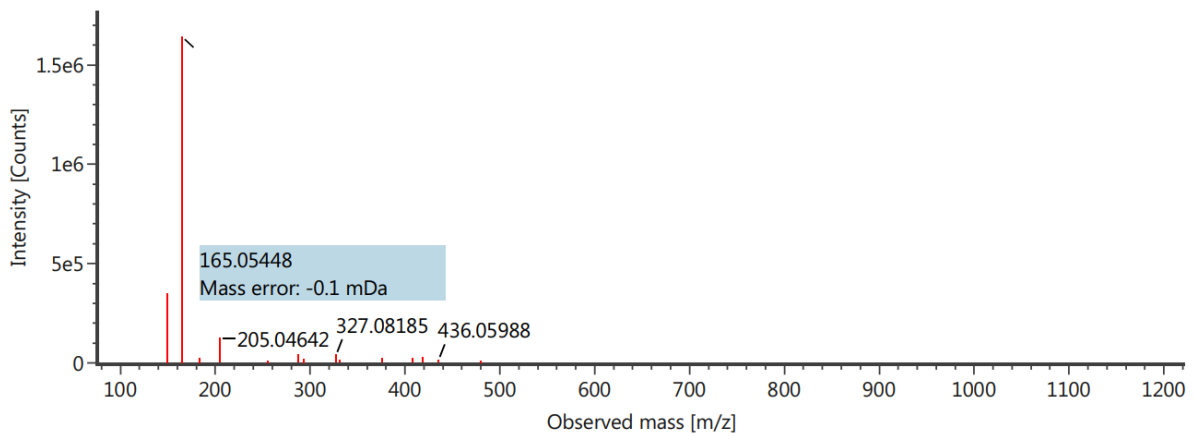

## Compound 2. Sugiol

Channel name: 1: +301.2165 (50.8 PPM) +302.2199 (50.8 PPM) +303.2250 (50.8 PPM) : TOF MS<sup>E</sup> (100-1200) 6eV ESI+ - Low CE :  
Integrated : Smoothed

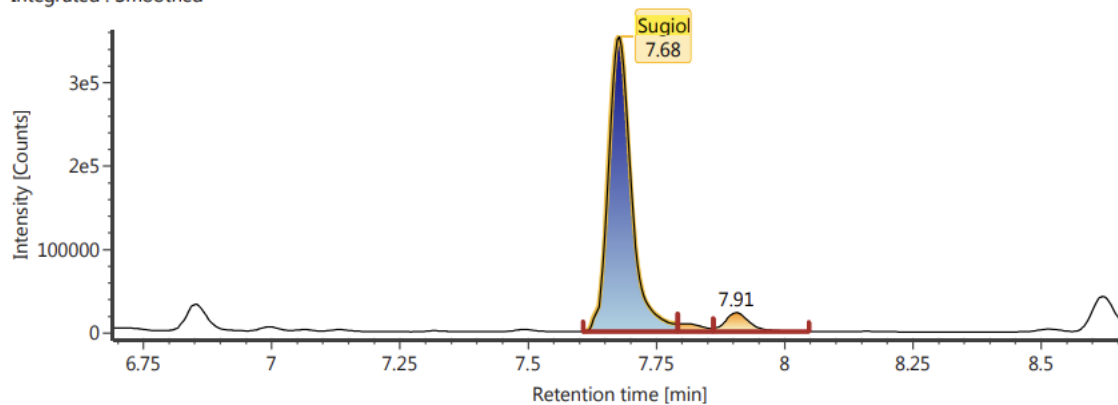

### Low Energy

Item description:

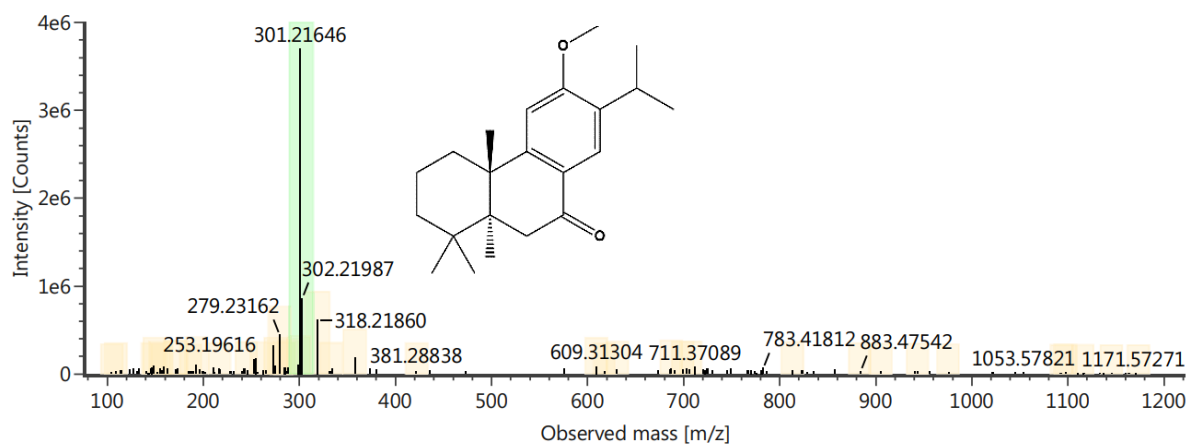

### High Energy

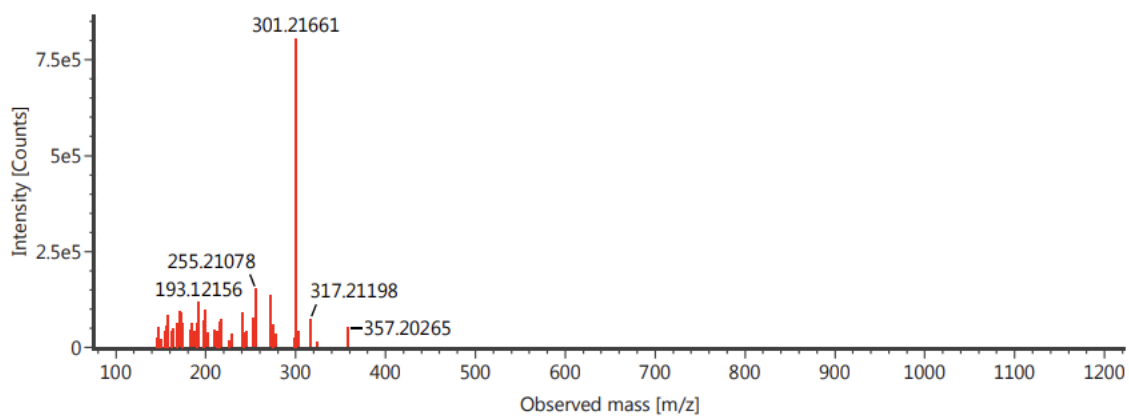

# Compound 3. Stigmastan-3,6-dione

Channel name: 1: +429.3730 (50.8 PPM) +430.3764 (50.8 PPM) +431.3806 (50.8 PPM) +432.3853 (50.8 PPM) : TOF MS<sup>E</sup> (100-1200)  
6eV ESI+ - Low CE : Integrated : Smoothed

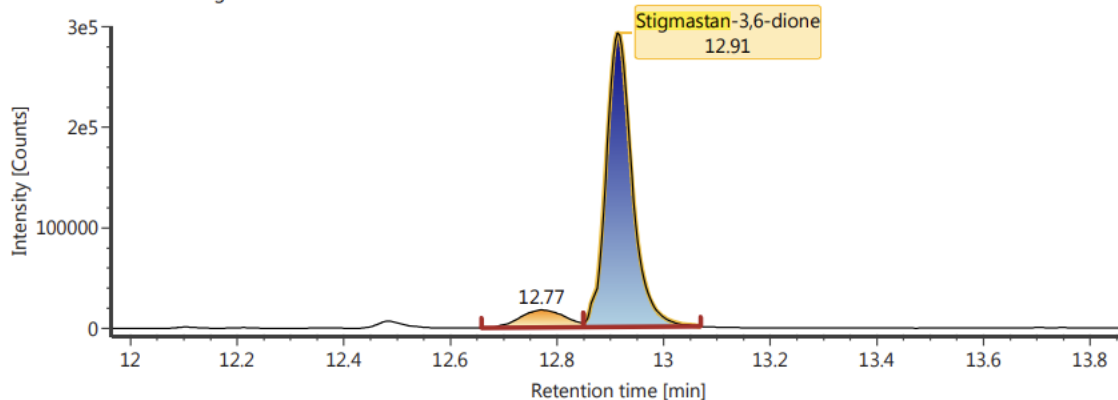

## Low Energy

Item description:

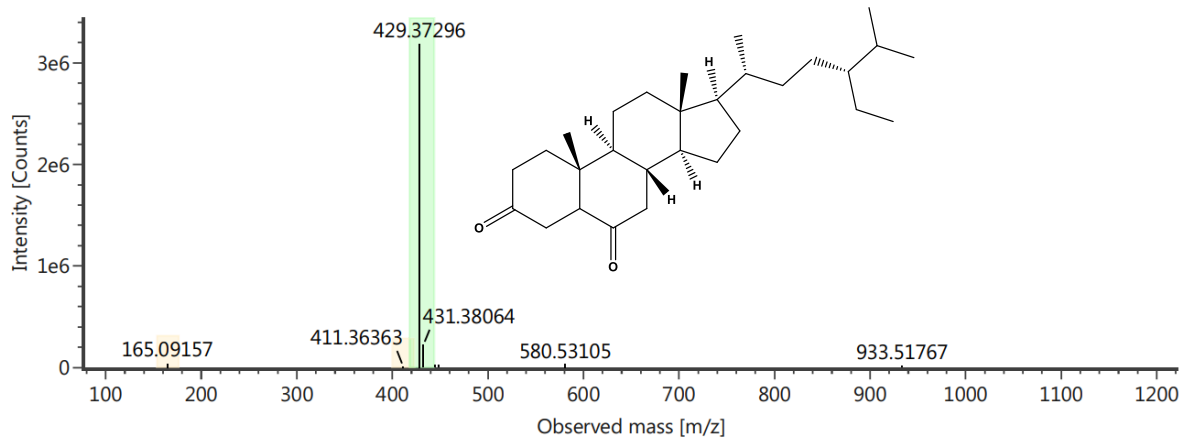

## High Energy

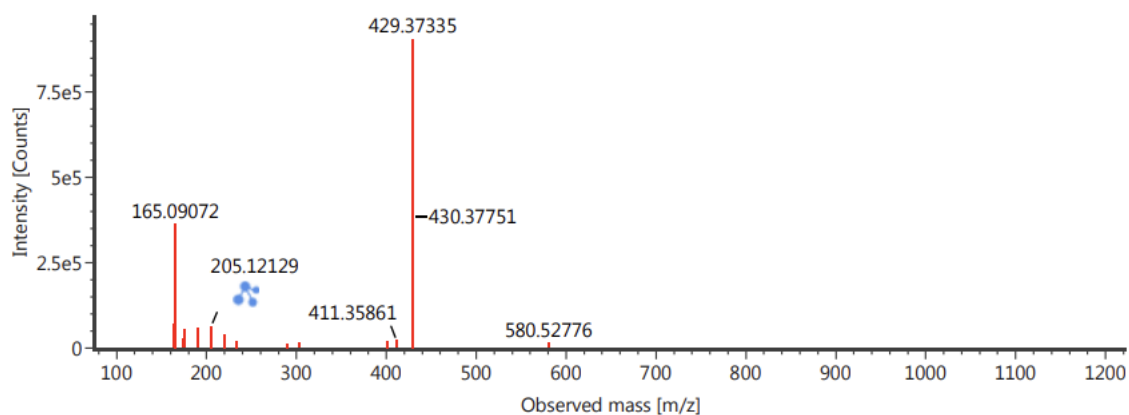

# Compound 4. Digiprolactone

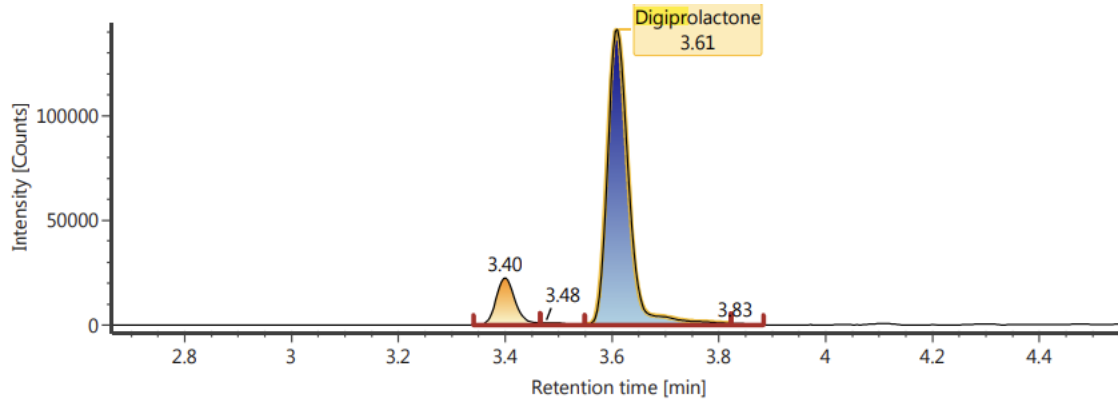

## Low Energy

Item description:

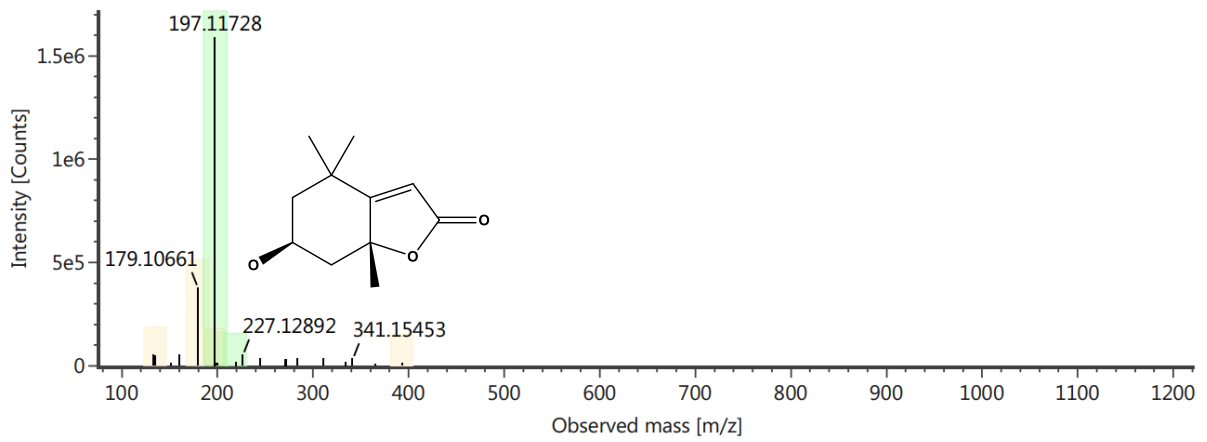

## High Energy

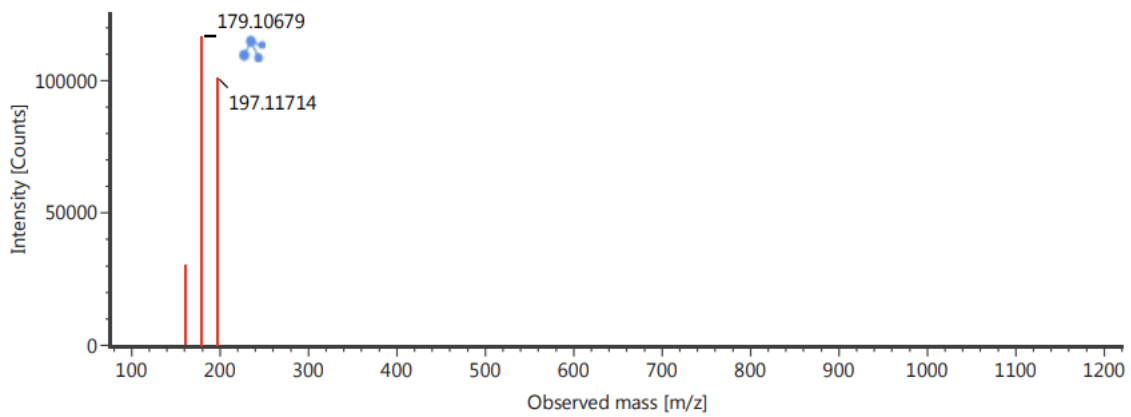

# Compound 5. Azedarachin C

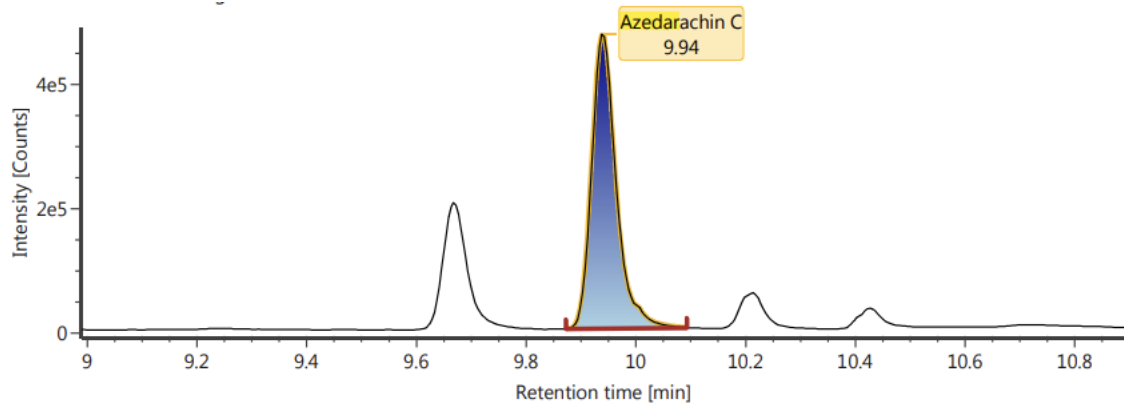

## Low Energy

Item description:

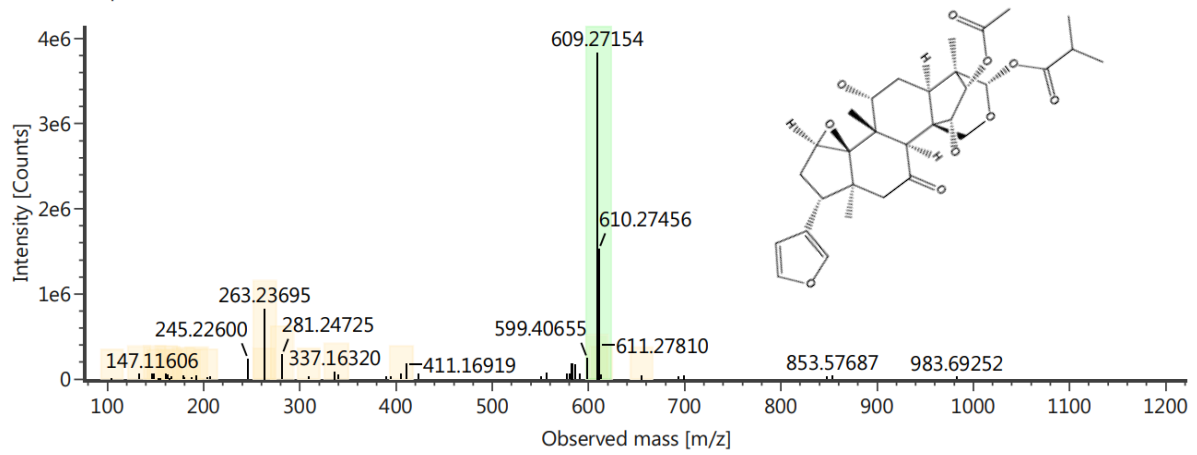

## High Energy

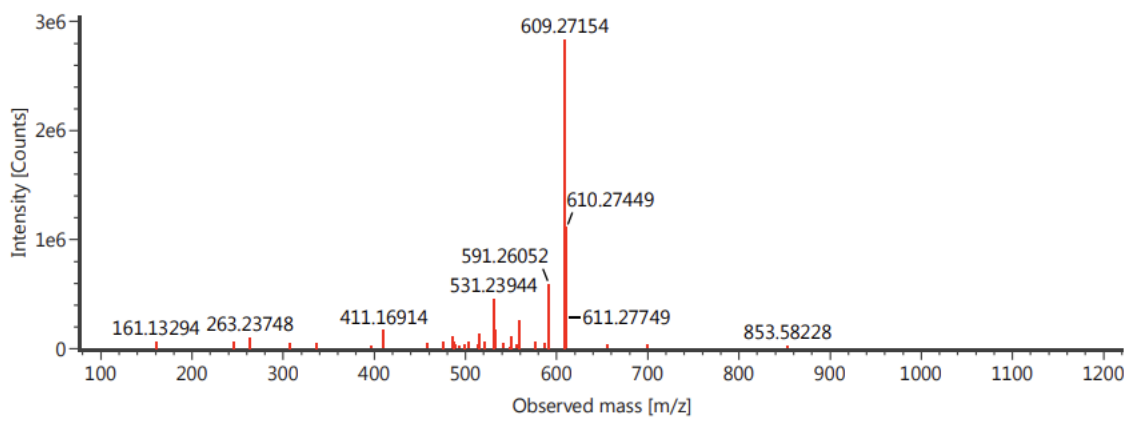

# Compound 6. Curculigoside

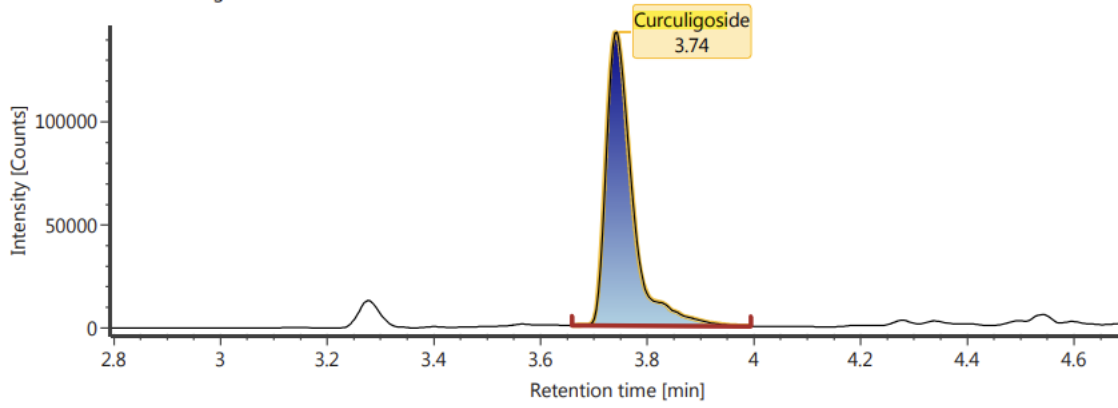

## Low Energy

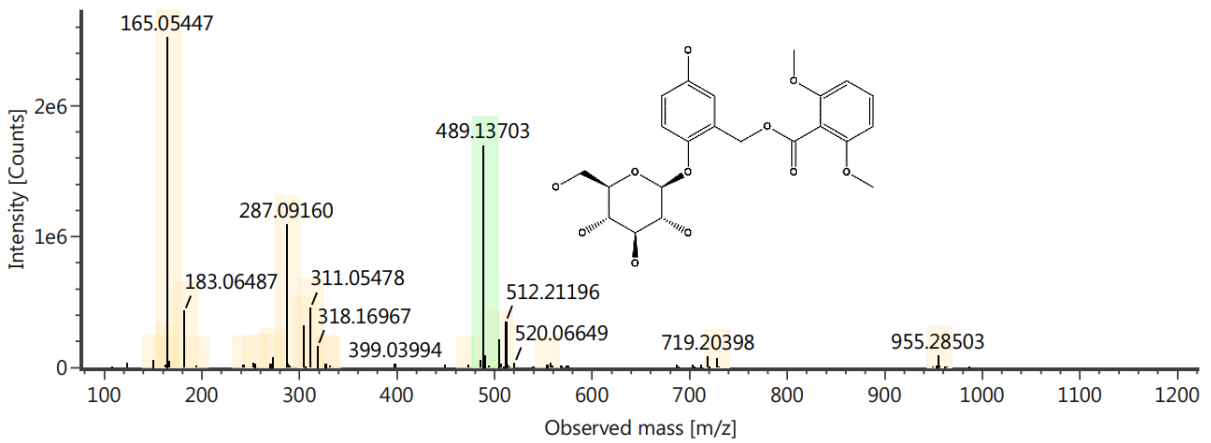

## High Energy

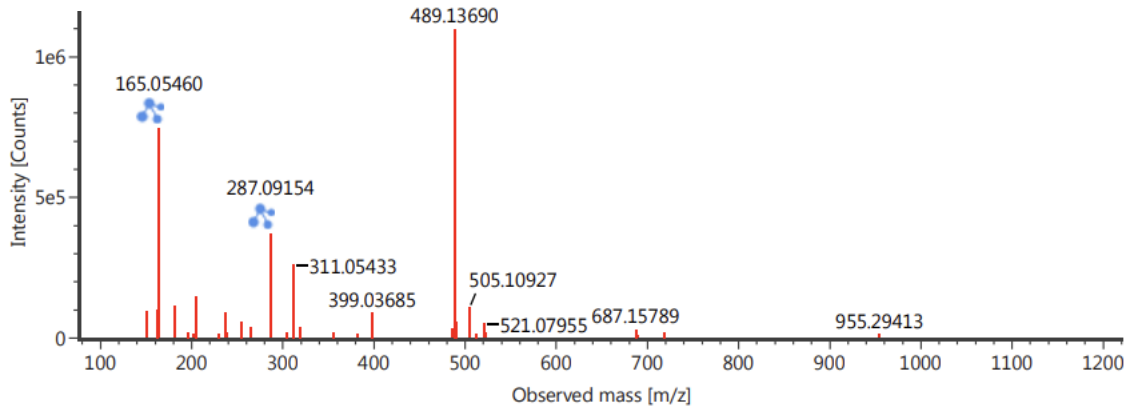

# Compound 7. Aviprin

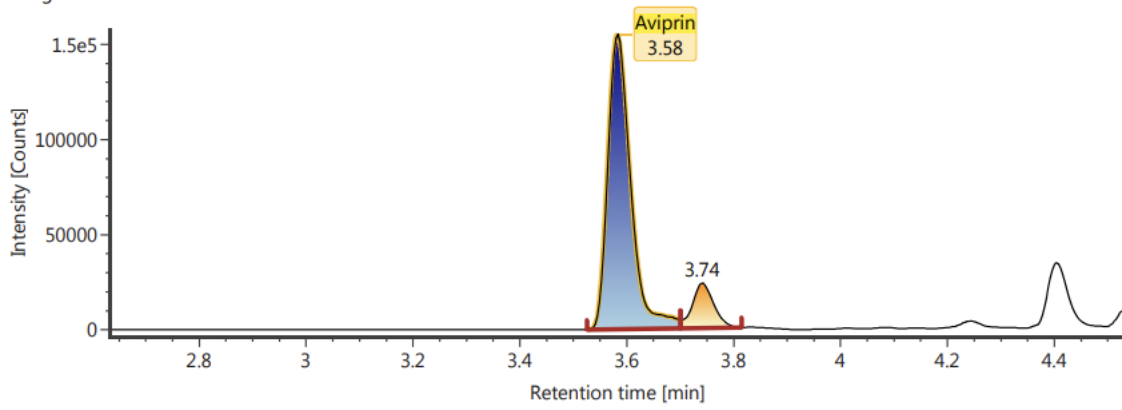

## Low Energy

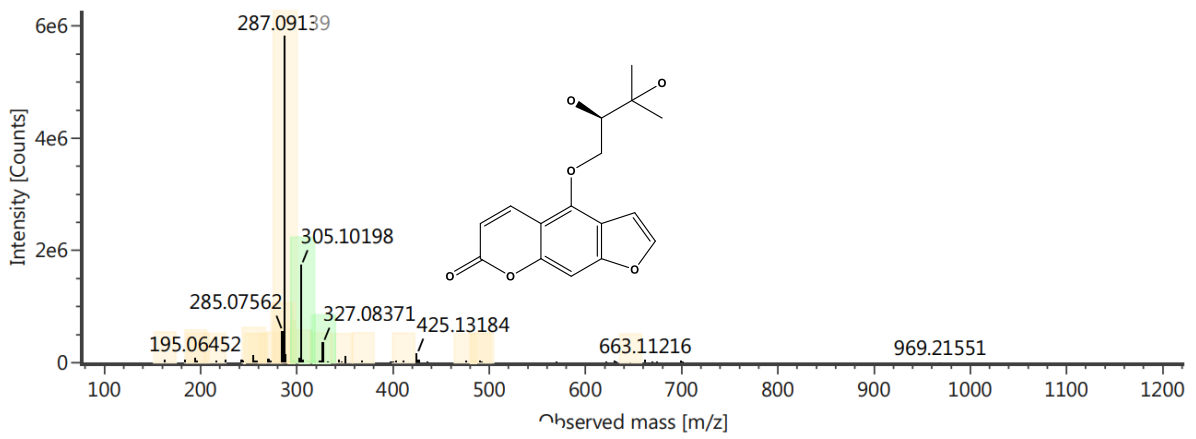

## High Energy

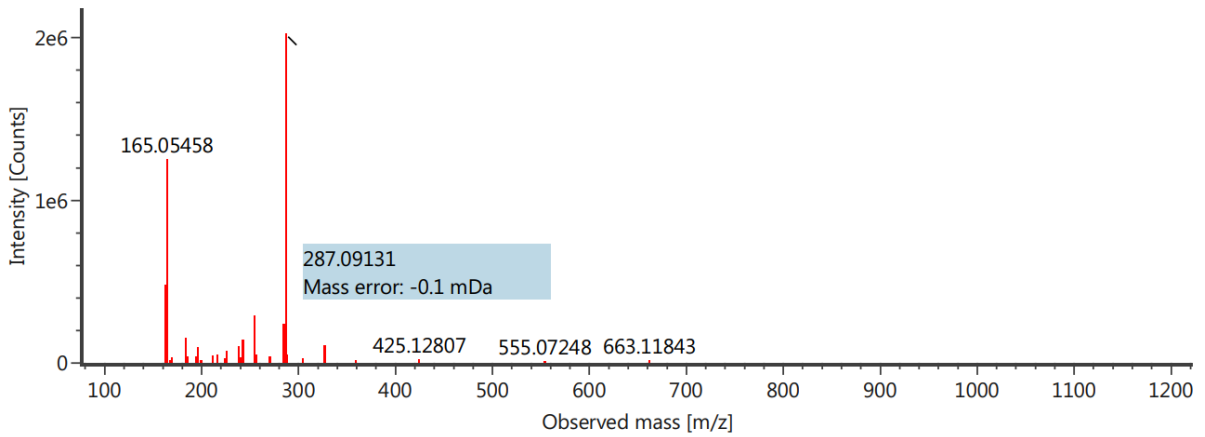

# Compound 8. Lucialdehyde B

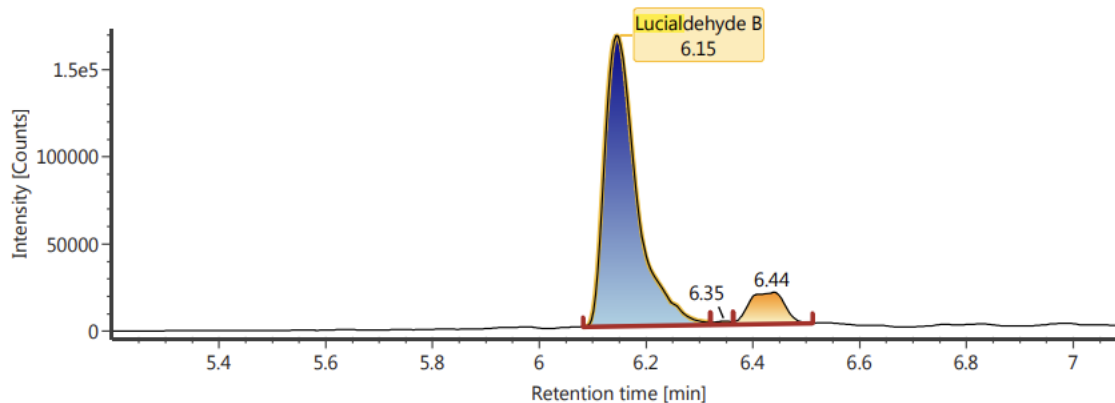

## Low Energy

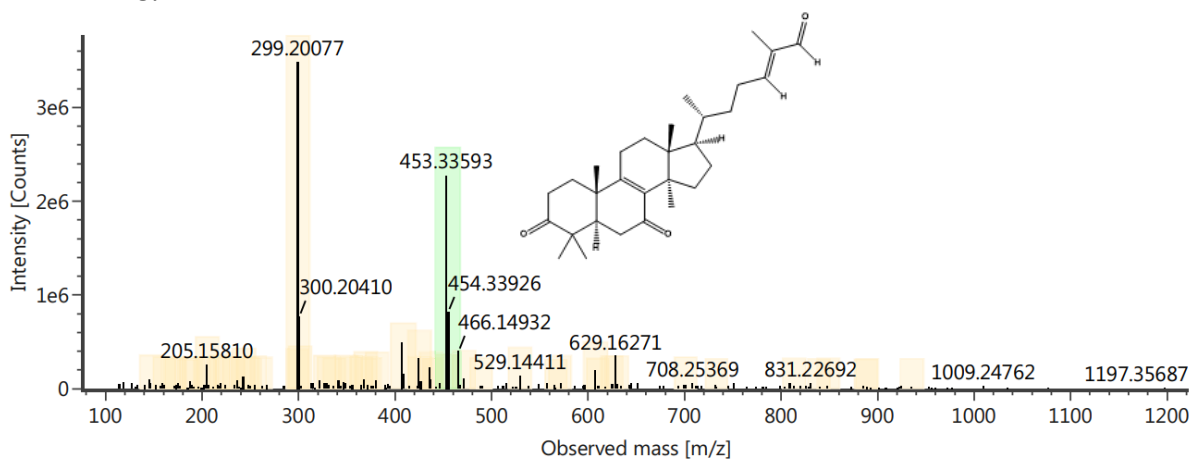

## High Energy

Item description:

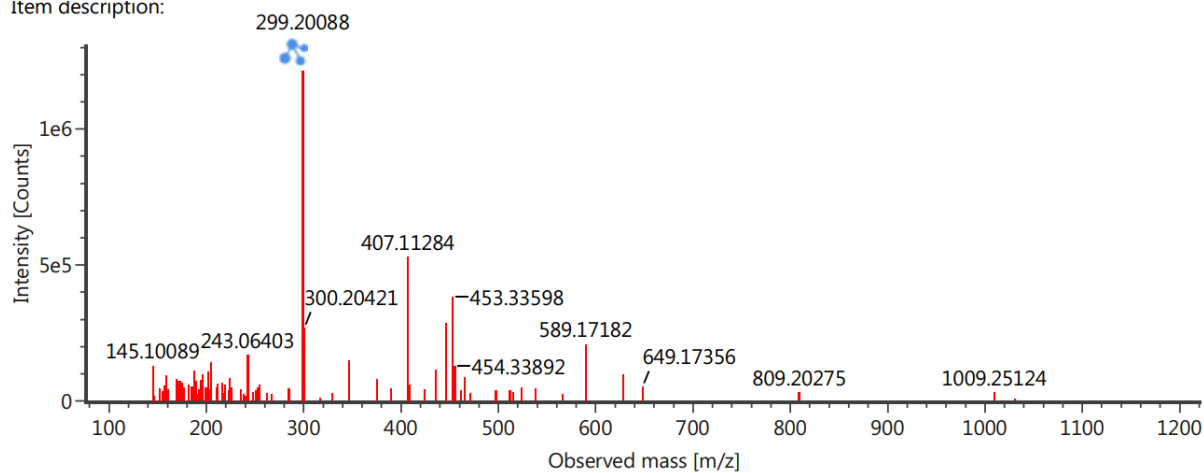



# Compound 9. 3-tert-butyl-4-methoxyphenol

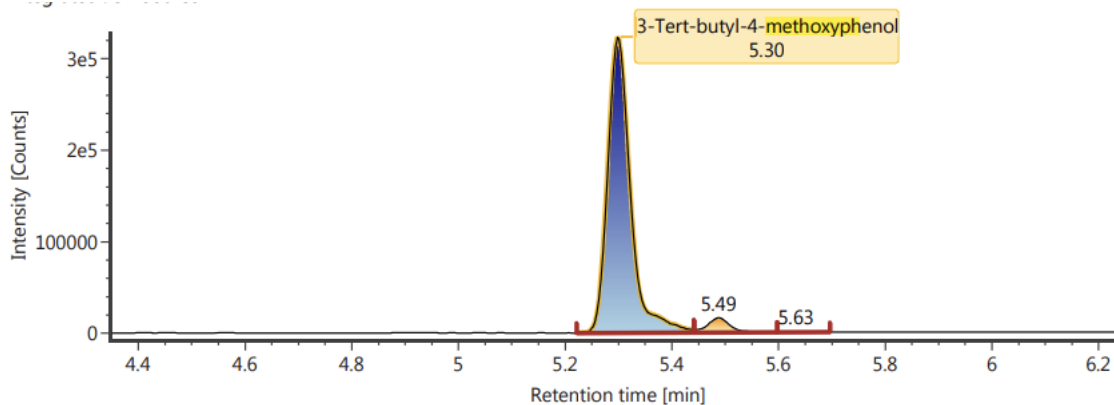

## Low Energy

Item description:

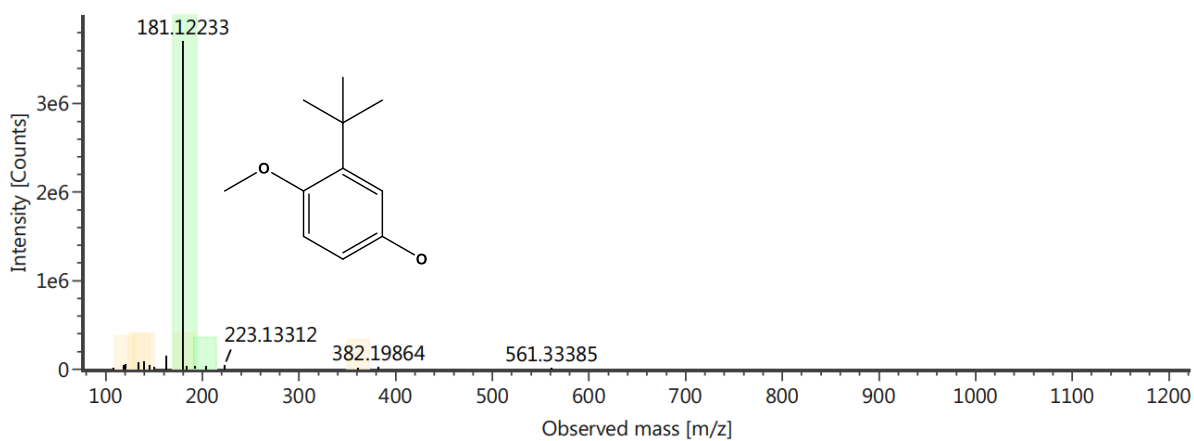

## High Energy

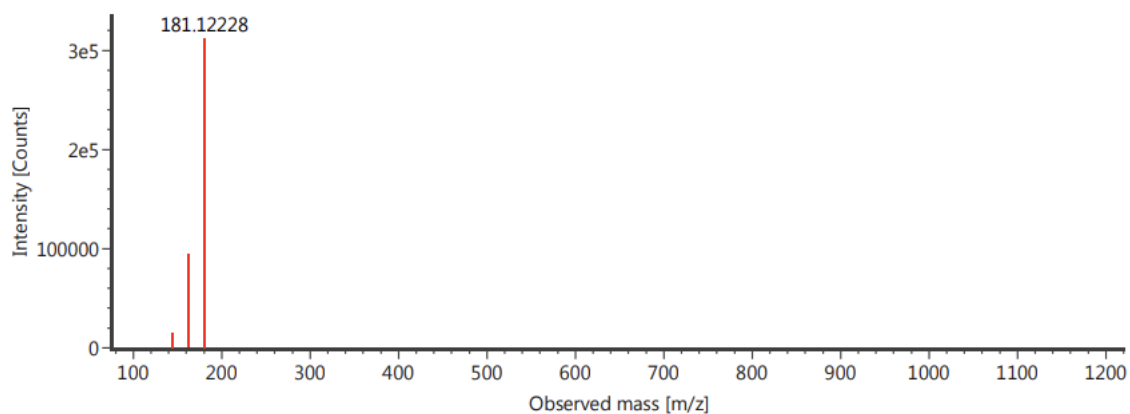

## Compound 10. Guaiacol

Channel name: 1: +125.0596 (50.8 PPM) +126.0628 (50.8 PPM) : TOF MS<sup>e</sup> (100-1200) 6eV ESI+ - Low CE : Integrated : Smoothed

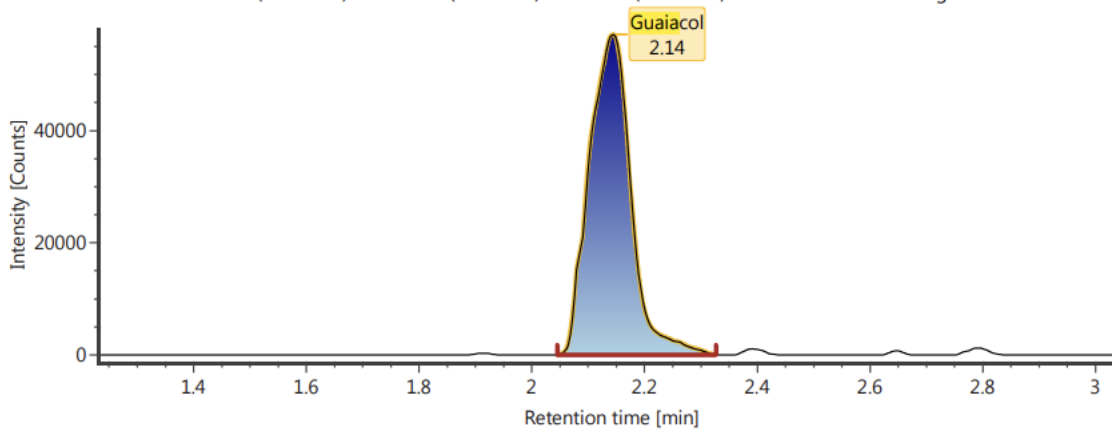

### Low Energy

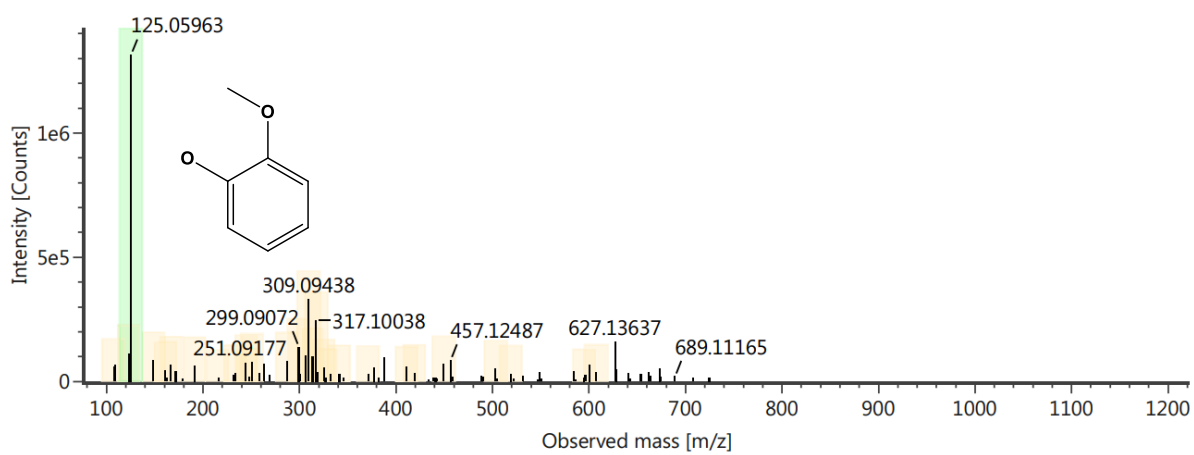

# Compound 11. Smilaxin

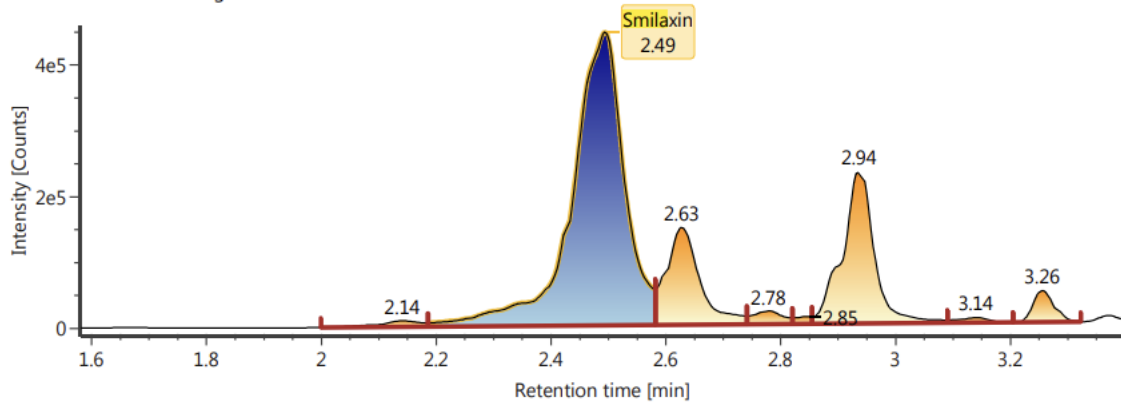

## Low Energy

Item description:

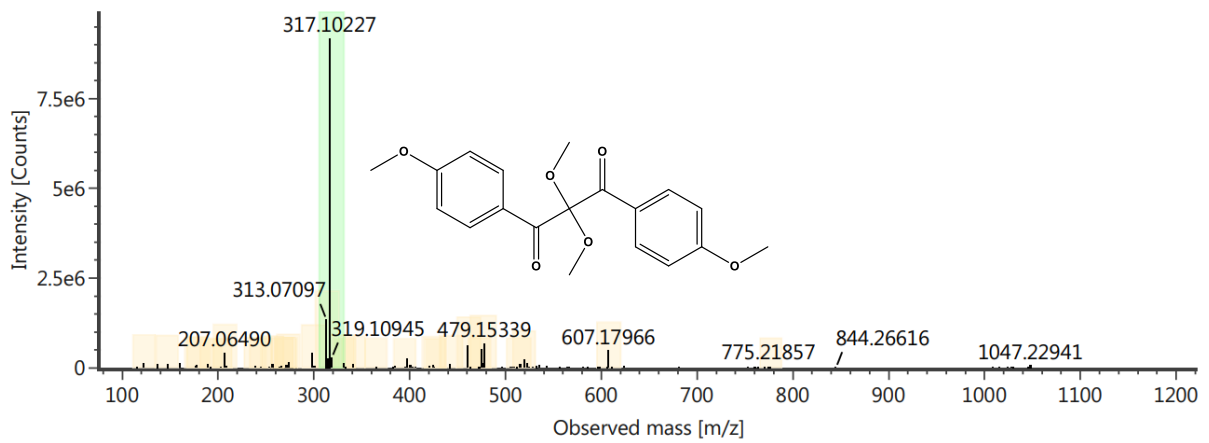

## High Energy

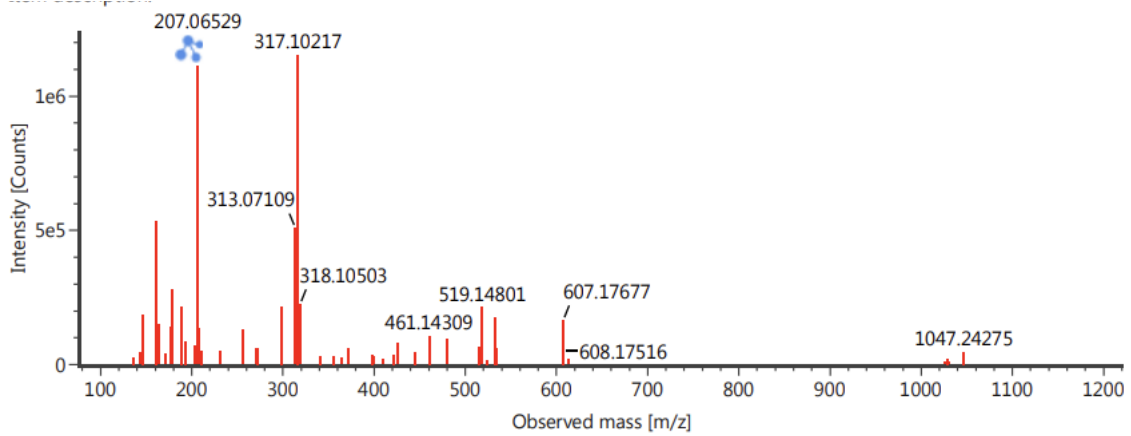

# Compound 12. 4-O-Caffeoylquinic acid-1

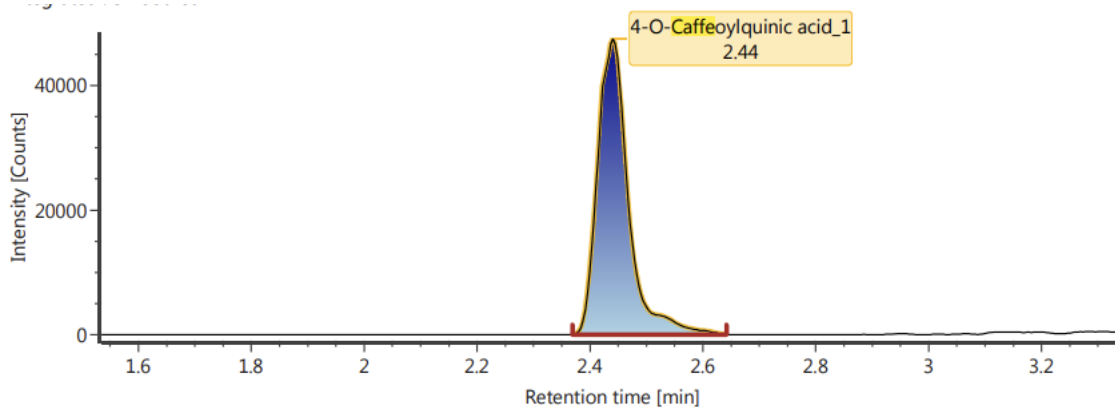

## Low Energy

Item description:

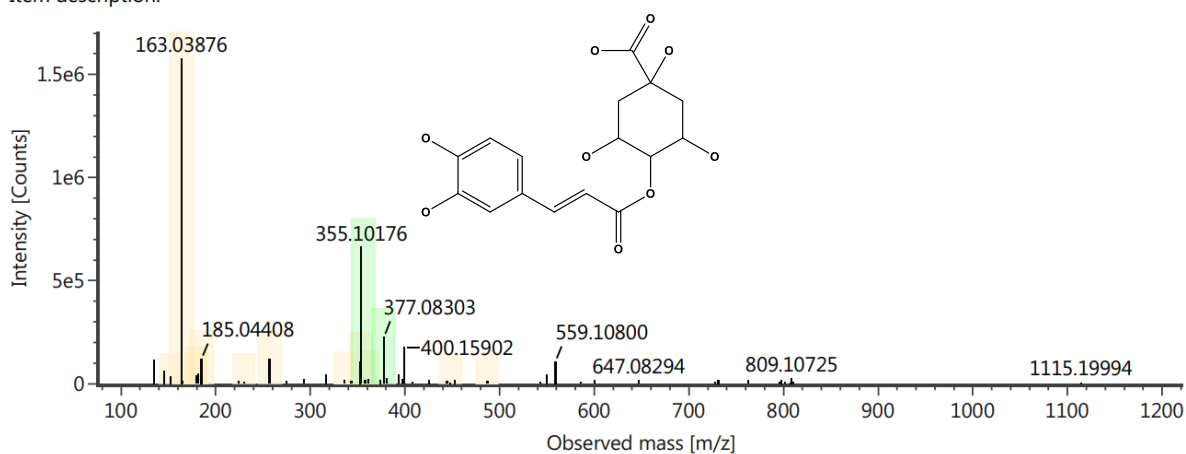

## High Energy

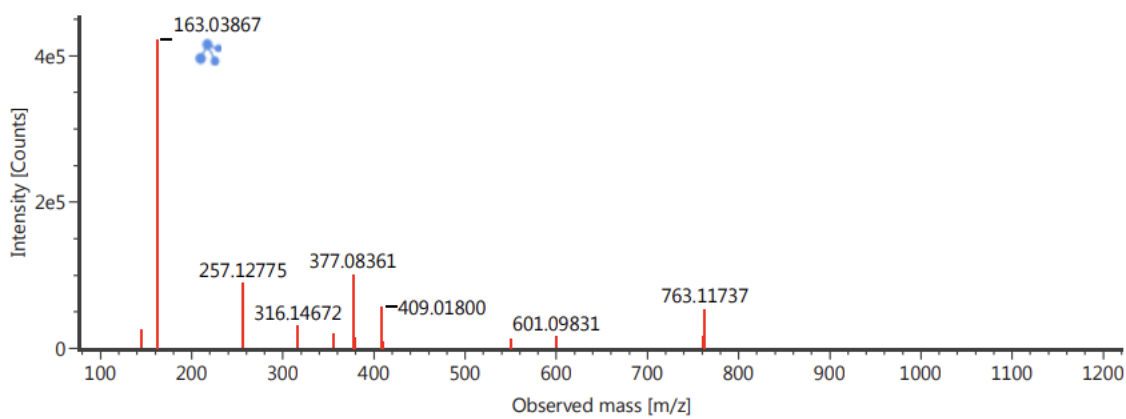

# Compound 13. 5,2',6'-Trihydroxy-7,8-dimethoxy-flavone-2'-O-β-D-glucopyranoside

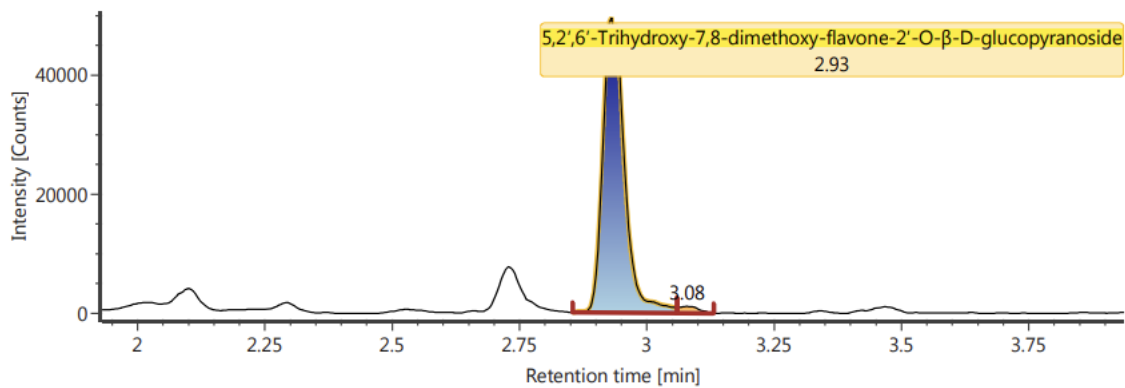

## Low Energy

Item description:

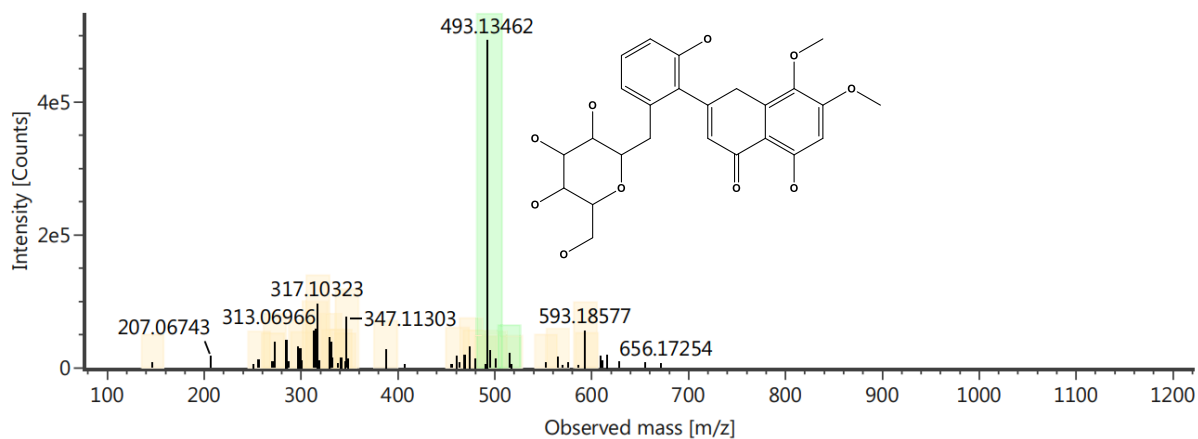

## High Energy

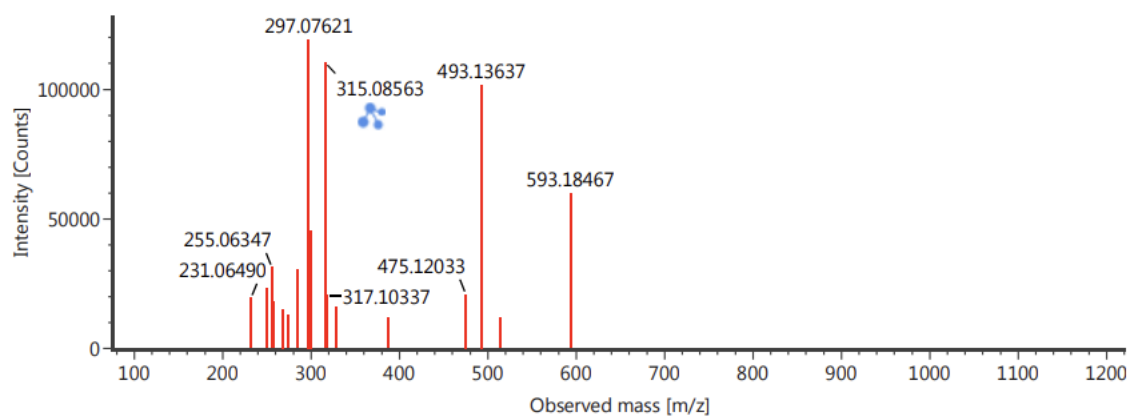

## Compound 14. 5,7,3',5'-Tetrahydroxyflavanone

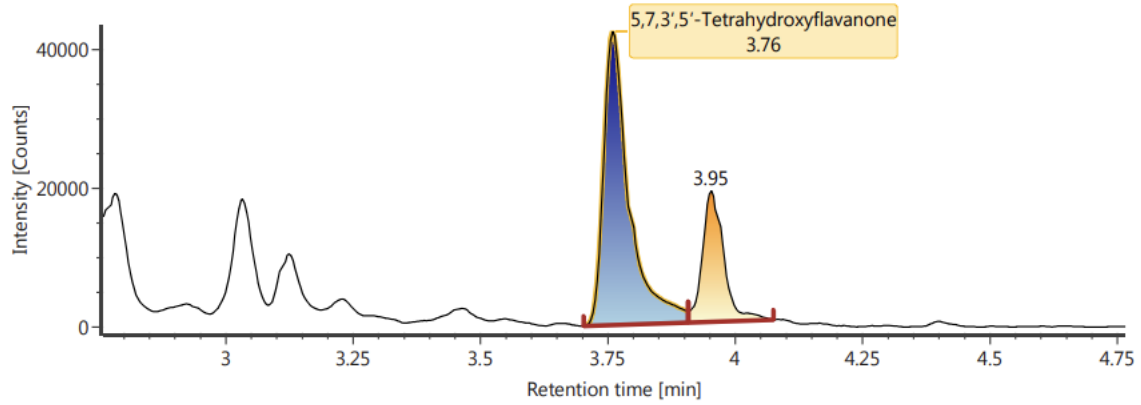

### Low Energy

Item description:

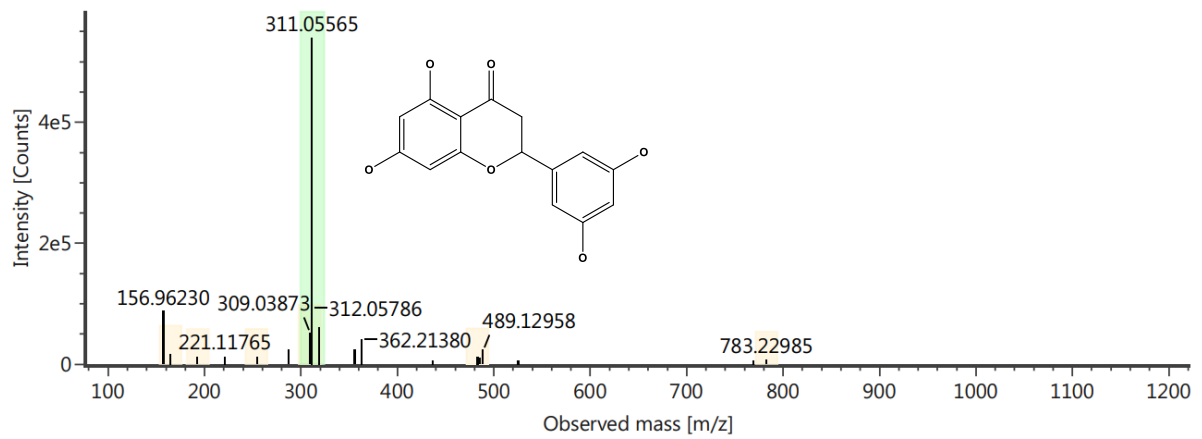

### High Energy

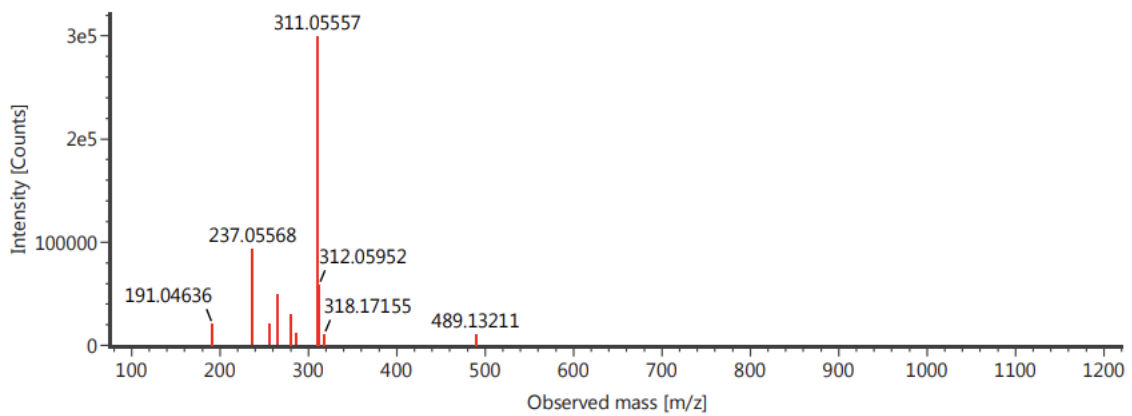

# Compound 15. Quercetin

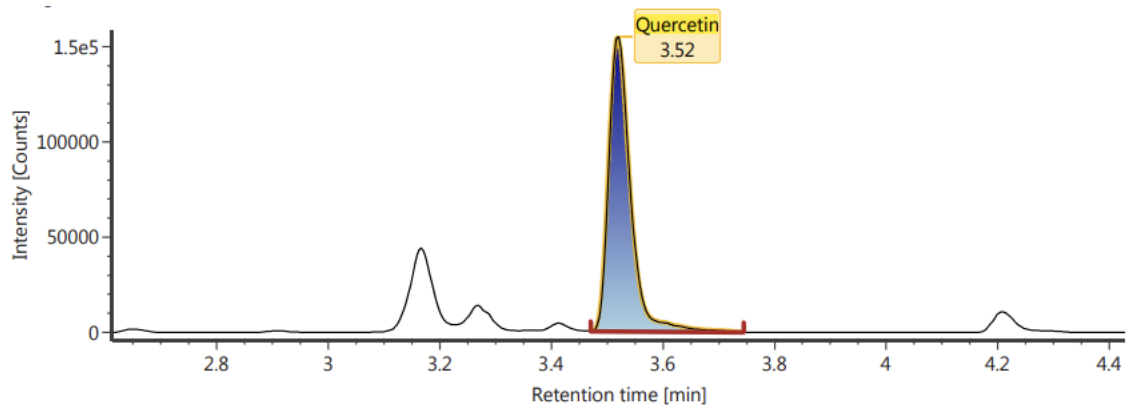

## Low Energy

Item description:

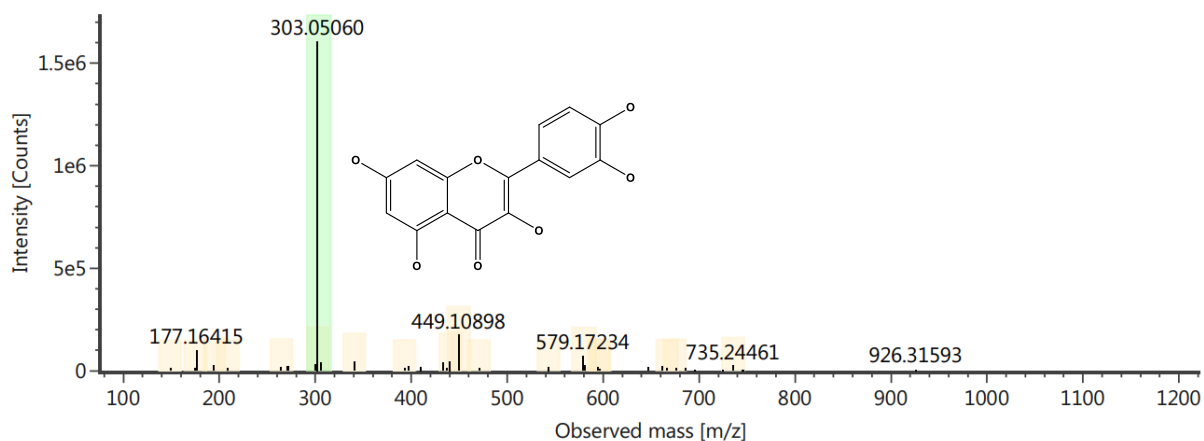

## High Energy

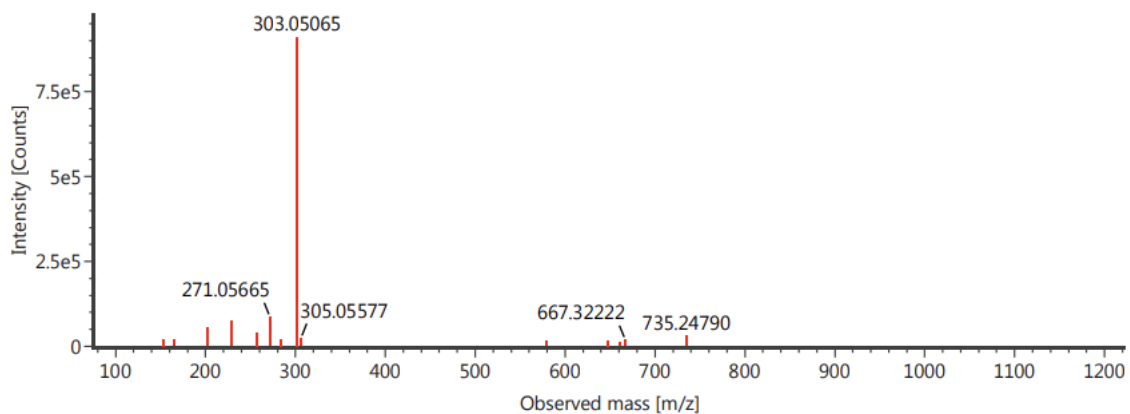

Table 1.

Phytochemical screening of *C. latifolia* extracts using LC-MS/MS.

| No | RT (min) | Observed MS (m/z) | Molecular ion | Compounds                                                         | Molecular Formula                               | Extract        |
|----|----------|-------------------|---------------|-------------------------------------------------------------------|-------------------------------------------------|----------------|
| 1  | 3.36     | 183.06            | M+H, +Na      | Methyl-3-hydroxy-4-methoxybenzoate                                | C <sub>9</sub> H <sub>10</sub> O <sub>4</sub>   | HRE, REAE, REE |
| 2  | 7.68     | 301.21            | M+H           | Sugiol                                                            | C <sub>20</sub> H <sub>28</sub> O <sub>2</sub>  | HRE            |
| 3  | 12.91    | 429.37            | M+H           | Stigmastan-3,6-dione                                              | C <sub>29</sub> H <sub>48</sub> O <sub>2</sub>  | HSE, REAE      |
| 4  | 3.61     | 197.12            | M+H           | Digiprolactone                                                    | C <sub>11</sub> H <sub>16</sub> O <sub>3</sub>  | HLE, LEAE      |
| 5  | 9.94     | 609.27            | M+H           | Azedarachin C                                                     | C <sub>32</sub> H <sub>42</sub> O <sub>10</sub> | LEAE           |
| 6  | 3.75     | 489.14            | M+H, +Na      | Curculigoside                                                     | C <sub>22</sub> H <sub>26</sub> O <sub>11</sub> | REAE, REE      |
| 7  | 3.58     | 305.102           | M+H, +Na      | Aviprin                                                           | C <sub>16</sub> H <sub>16</sub> O <sub>6</sub>  | REAE           |
| 8  | 6.14     | 453.34            | M+H           | Lucialdehyde B                                                    | C <sub>30</sub> H <sub>44</sub> O <sub>3</sub>  | SEAE, REAE     |
| 9  | 5.30     | 181.12            | M+H           | 3-tert-butyl-4-methoxyphenol                                      | C <sub>11</sub> H <sub>16</sub> O <sub>2</sub>  | HLE            |
| 10 | 2.14     | 125.06            | M+H           | Guaiacol                                                          | C <sub>7</sub> H <sub>8</sub> O <sub>2</sub>    | REE            |
| 11 | 2.49     | 317.102           | M+H           | Smilaxin                                                          | C <sub>17</sub> H <sub>16</sub> O <sub>6</sub>  | REE            |
| 12 | 2.44     | 355.102           | M+H, +Na      | 4-O-Caffeoylquinic acid-1                                         | C <sub>16</sub> H <sub>18</sub> O <sub>9</sub>  | SEE, LEE       |
| 13 | 2.93     | 492.13            | M+H, +Na      | 5,2',6'-Trihydroxy-7,8-dimethoxy-flavone-2'-O-β-D-glucopyranoside | C <sub>23</sub> H <sub>24</sub> O <sub>12</sub> | SEE            |
| 14 | 3.76     | 288.6             | M+H, +Na      | 5,7,3',5'-Tetrahydroxyflavanone                                   | C <sub>15</sub> H <sub>12</sub> O <sub>6</sub>  | SEE            |
| 15 | 3.52     | 303.05            | M+H           | Quercetin                                                         | C <sub>15</sub> H <sub>10</sub> O <sub>7</sub>  | LEE            |
